# Supplementary material for: Single-cell spatial proteomic imaging for human neuropathology
Source: PubMed Central journal article supplement (PMC9636771; doi:10.1186/s40478-022-01465-x), 2022-11-04
Supplement: 40478_2022_1465_MOESM1_ESM.pdf [file 40478_2022_1465_MOESM1_ESM.pdf]

## **SUPPLEMENTAL FIGURES**

**This includes:**

Figs. S1 to S6

Figure S1 ↑

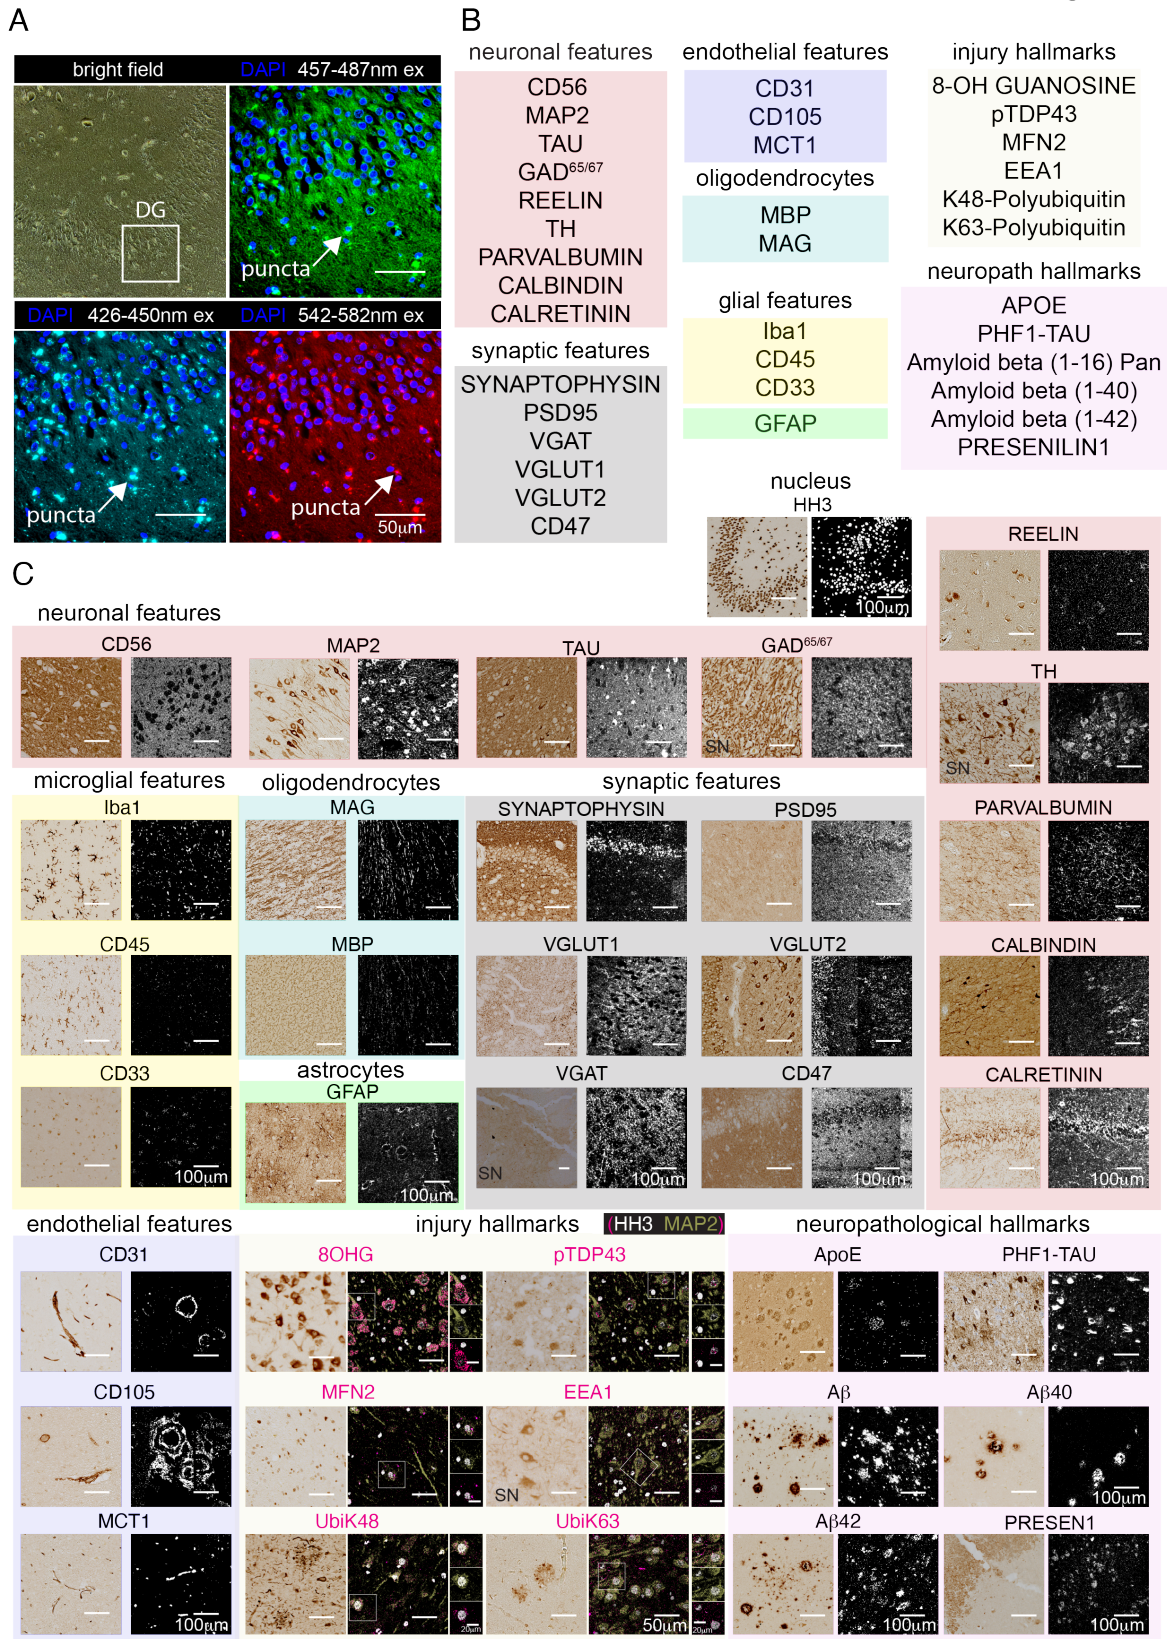

**Figure S1. Validation of MIBI-TOF antibody panel on FFPE archival brain tissue.**

(A) Autofluorescence photomicrographs of an unstained human hippocampus section under bright field, green (457-487nm excitation), cyan (426-450nm excitation) and red (542-582nm excitation) fluorescence channels. (B) List of brain specific targets used for MIBI-TOF analysis. (C) Immunohistochemical and MIBI-TOF antibody validation and cross comparison of chromogenic and spectral images.

Figure S2 

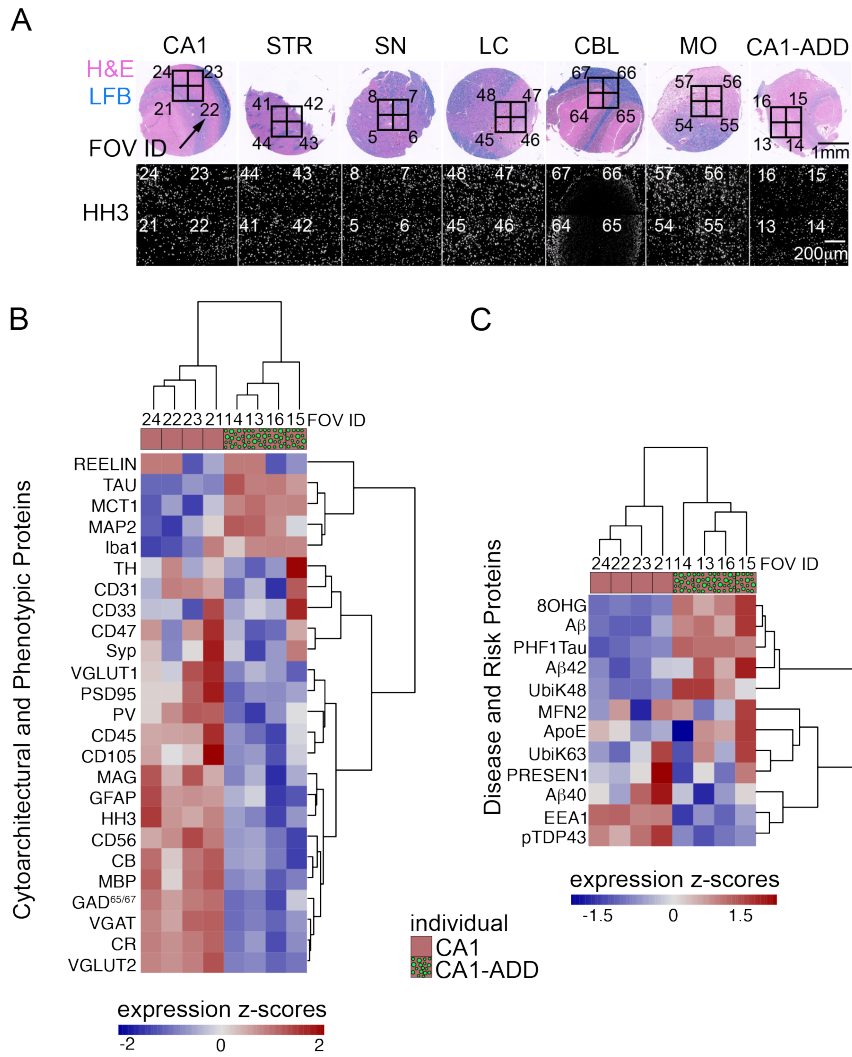

**Figure S2. Global Expression Analysis of Multiplex Proteomic Data Stratifies cognitivenormal and ADD CA1 cores.**

(A) Photomicrograph of brain TMA cores stained standard histological Luxol Fast Blue (LFB) for myelin with hematoxylin and eosin (H&E) for cells (top). Green boxes depict the rastered area ( $4 \times 4$ ,  $500 \mu\text{m}^2$ ) and each FOV is assigned an ID. The spectral images of HH3 show the presence and distribution of nuclei in each FOV and number represent the IDs for each FOV (bottom). (B-C) of mean z-score distribution of pixel expression of proteins per rastered FOV (row normalized). Columns and rows are hierarchically clustered (Euclidean distance). Variance between and among FOVs are stratified in an unsupervised manner into normative and disease. Columns and rows are hierarchically clustered (Euclidean distance). (B) Showing cytoarchitectural changes between normative (CA1) and disease (CA1-ADD) in the CA1 TMA cores. (C) Showing AD disease and risk target protein changes between normative and disease in the CA1 TMA cores. Abbreviations: CA1, Cornu Ammonis 1; STR, Striatum; SN, Substantia Nigra; LC, Locus Coeruleus; CBL, Cerebellum; MO, Medulla Oblongata; CA1-ADD, Cornu Ammonis 1-AD dementia.

Figure S3 ↑

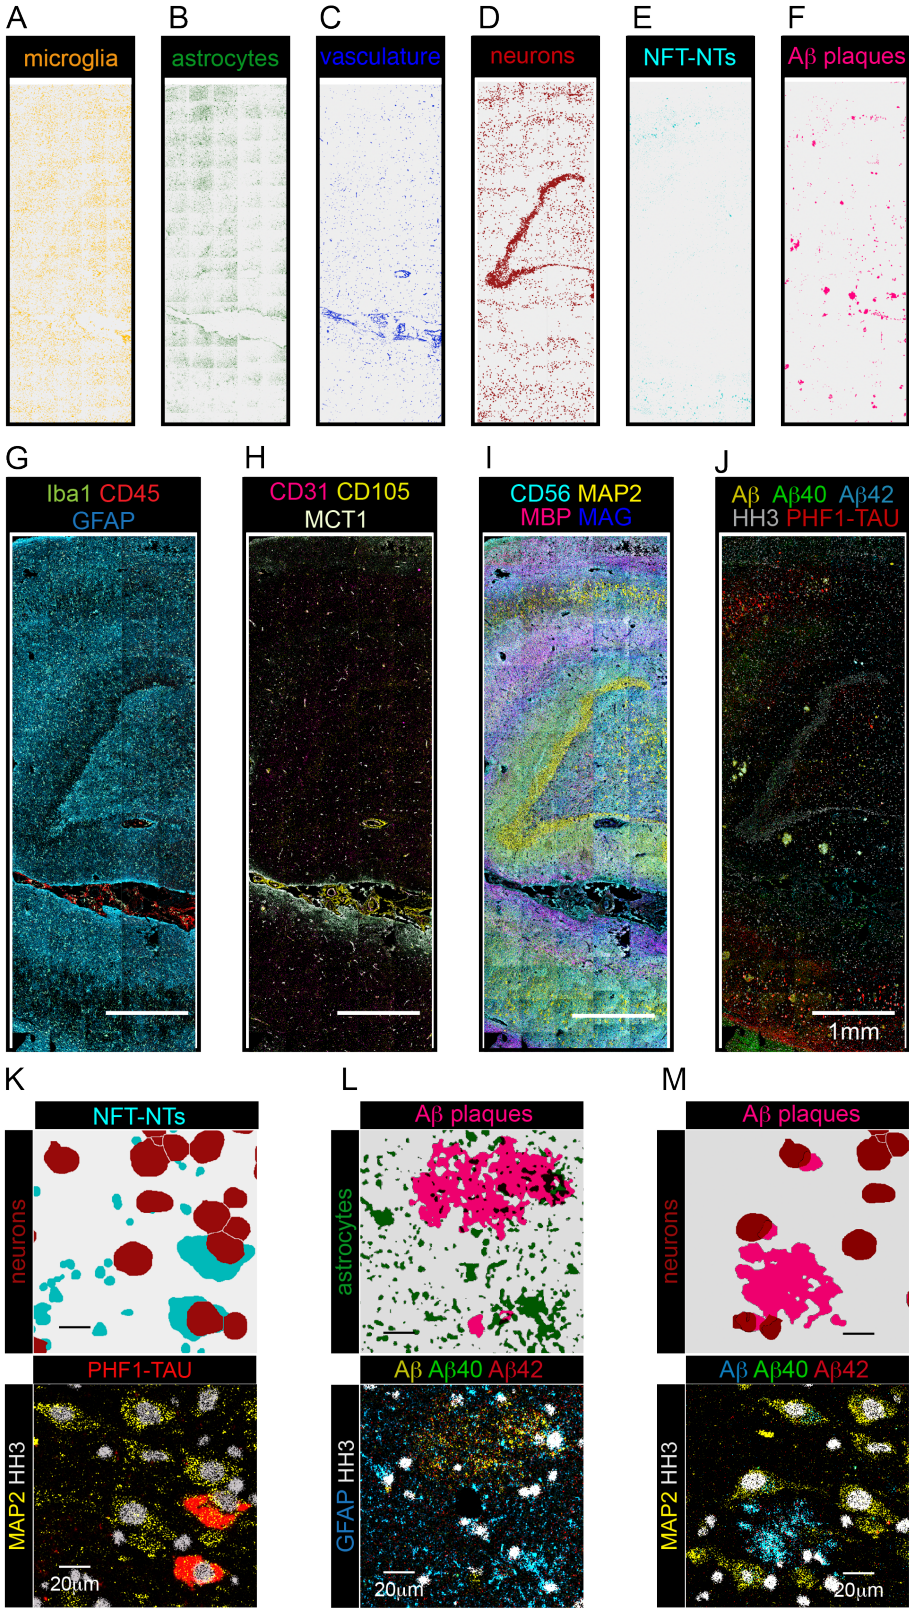

**Figure S3. Cell Phenotype Maps (CPM) of Segmented features in ADD hippocampus.** (A-F) Individual Cell Phenotype Maps (CPM) of nuclear and object segmented masks labelled by their phenotypes. (G-J) MIBI-TOF pseudo-colored spectral images for the different cells which are identified by their pan-markers (GFAP: astrocytes, Iba1-CD45: microglia, CD31-CD105-MCT1: vessels, MAP2: neurons, CD45: immune cells, MBP and MAG: Oligodendrocytes). (K-M) Segmented mask overlays of cell and proteopathy phenotypes with corresponding MIBI-TOF pseudo-colored spectral images.

cognitively normal no dementia (CN)

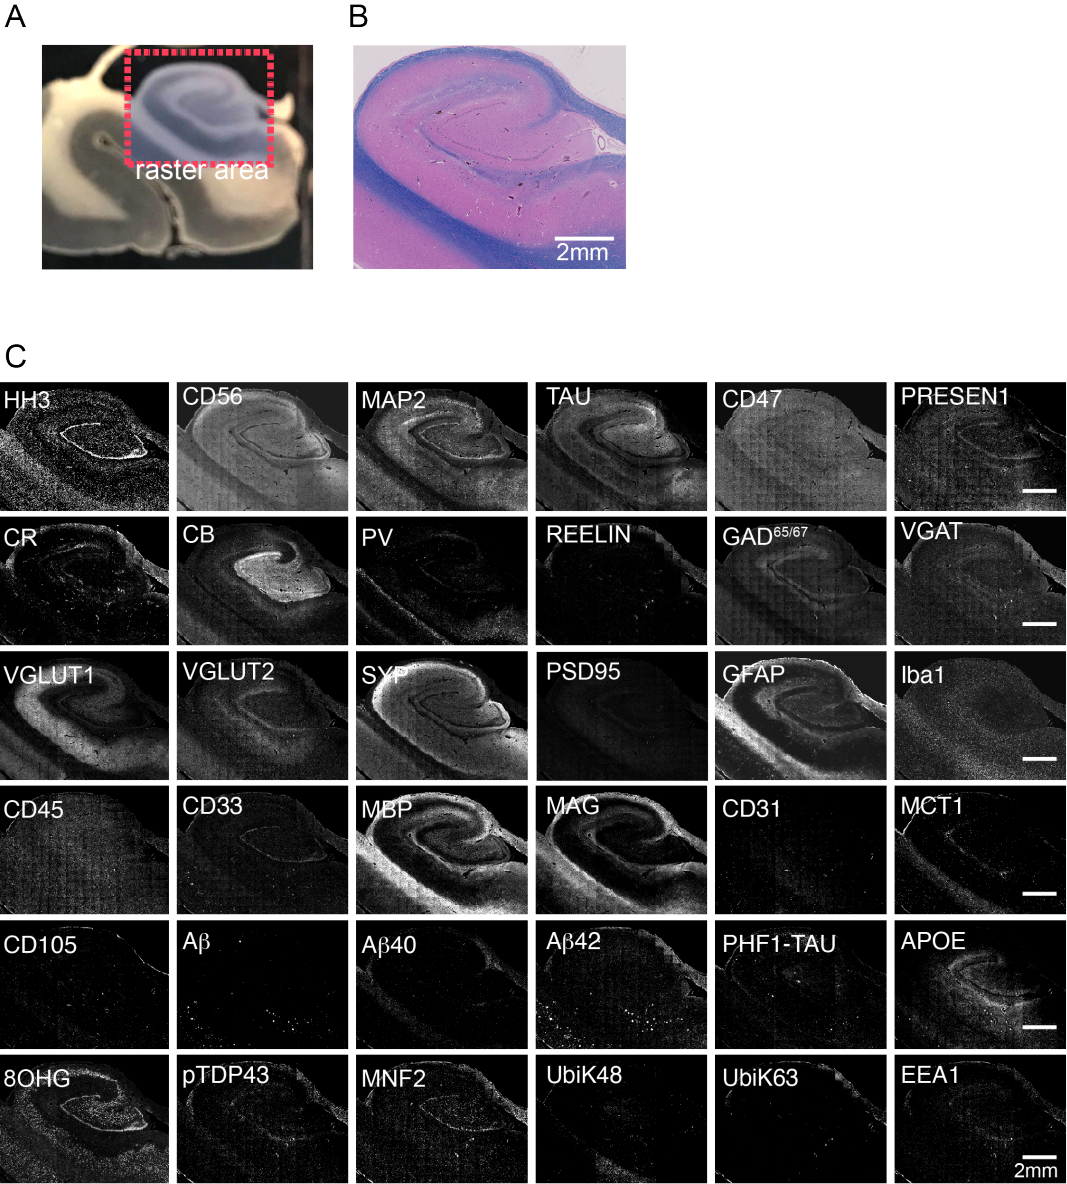



cognitively impaired no dementia (CIND)

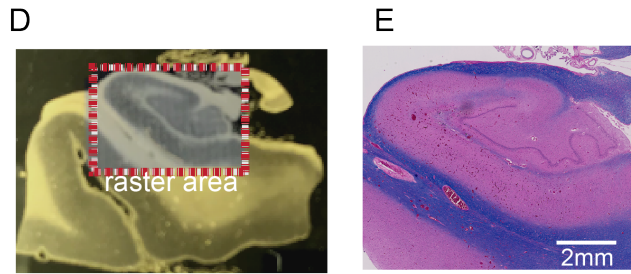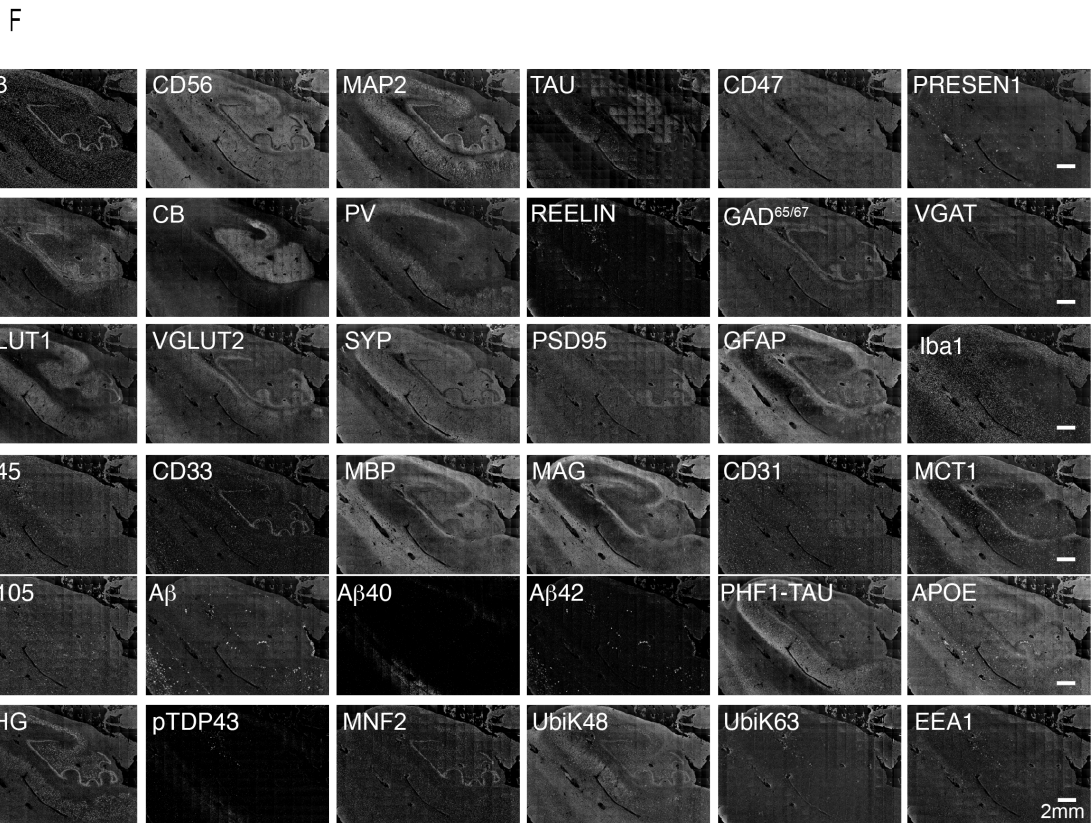

cognitively impaired with dementia (ADD)

G

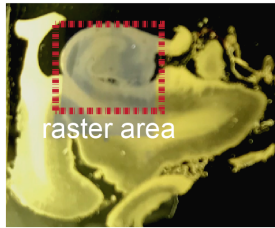

H

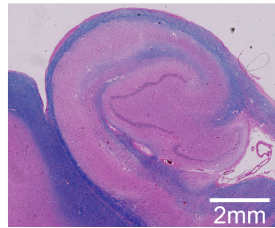

I

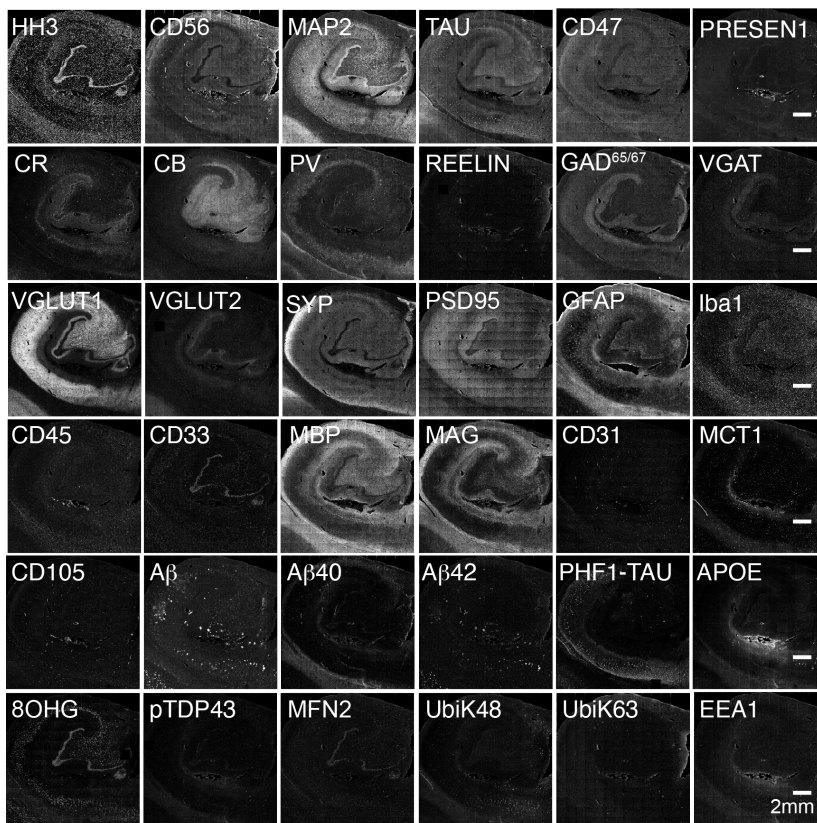

Figure S4J-L 

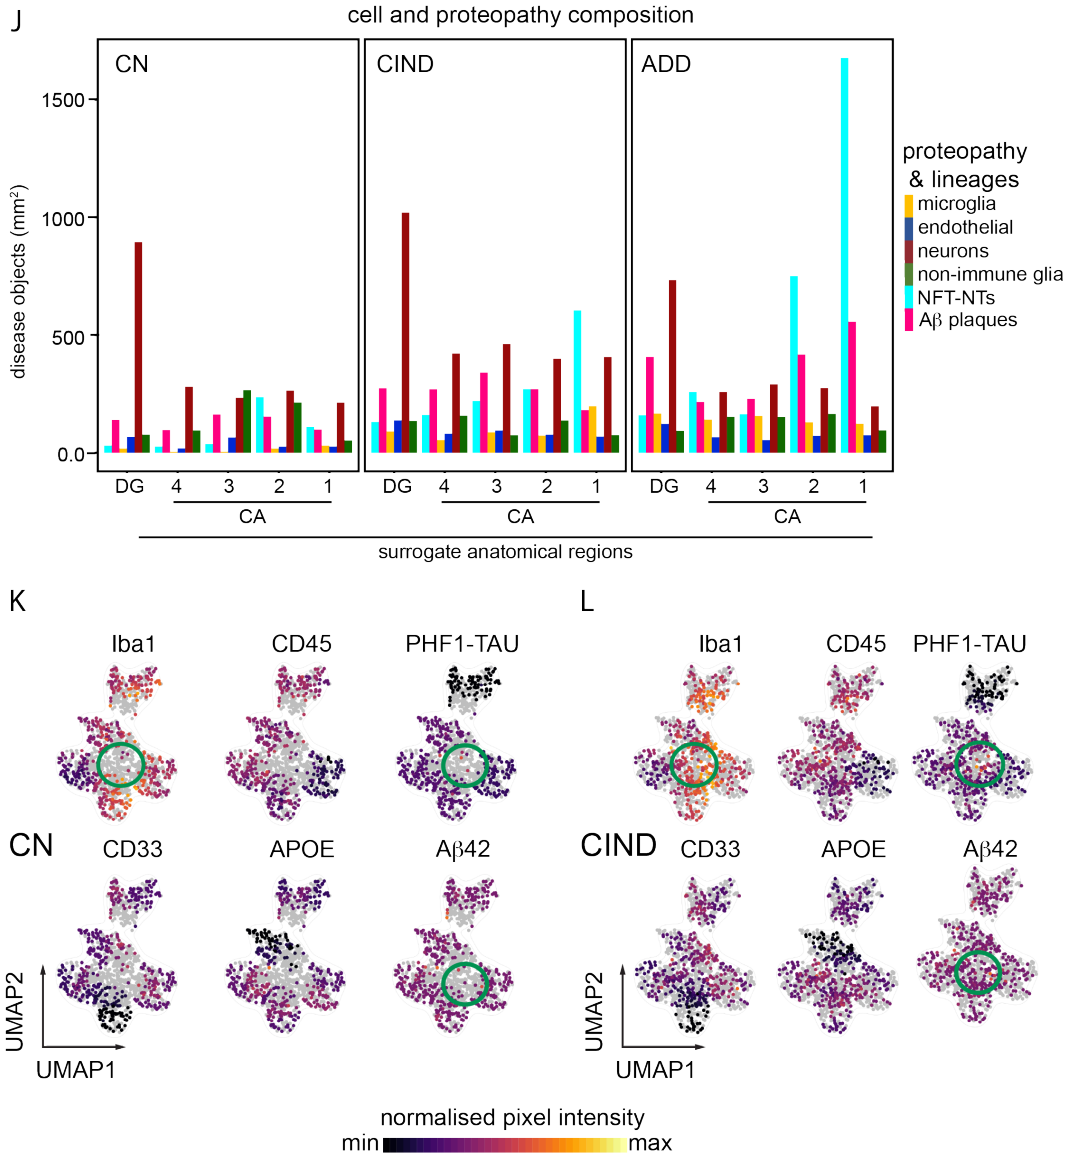

**Figure S4. Single-plex spectral images of CN, CIND and ADD and their breakdown of cell and proteopathy characteristics in anatomical regions.** (A, D, G) Archival mid-section hippocampi from CN, CIND, or ADD on conductive gold-slides. Red dashed boxes show rastered regions respectively. (B, E, H) Serial sections stained with standard histological Luxol Fast Blue (LFB) for myelin with hematoxylin and eosin (H&E) for cells. (C, F, I) Single plex MIBI spectral images for all 36 targets that were simultaneously acquired. Images for CN is of 300 FOVs tiled; CIND is of 260 FOVs tiled, ADD is of 196 tiled FOVs. Each FOV is 500 $\mu\text{m}^2$ . Images are gray scaled. (J) Normalized counts of cells and proteopathies within each  $\text{mm}^2$  of tissue across each hippocampal anatomical region and individual. (K) UMAP projections of CA1 microglia phenotyping channels in CN. Gray represents CA1 microglia from ADD, CIND samples. (L) UMAP projections of CA1 microglia phenotyping channels in CIND. Gray represents CA1 microglia from ADD, CN samples. Projection calculated using phenotypic markers. CIND and ADD are subsampled so that all conditions are represented by 447 microglia, the total number of CA1 microglia in the CN condition.

Figure S5 ↑

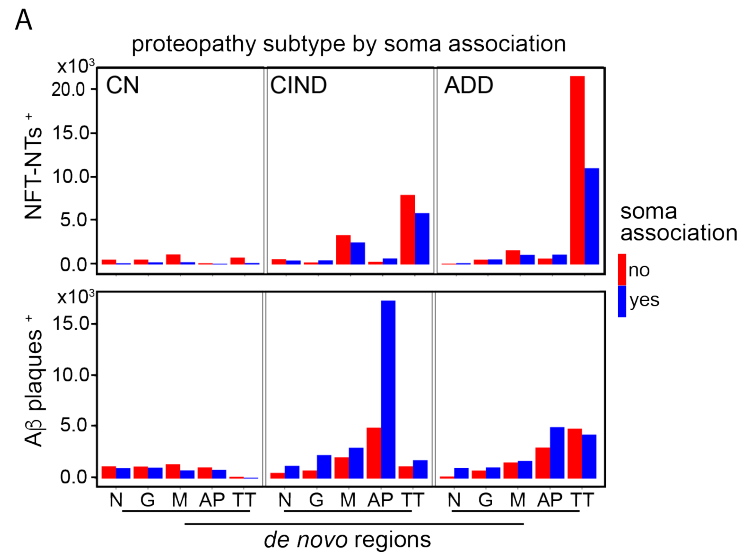

**Figure S5. Breakdown of cell and proteopathy characteristics in de novo regions.**

**(A)** Raw counts of proteopathies associated with a cell soma or not across the de novo regions. Highest counts of A $\beta$  plaques found in AP region within CIND (majority soma associated), highest counts of tau NFT-NTs found within TT in ADD (majority not soma associated). **(B)** Normalized mean expression of non-immune glia, microglia, endothelial cells, and neurons with associated phenotyping channels. Broken down across the *de novo* regions.

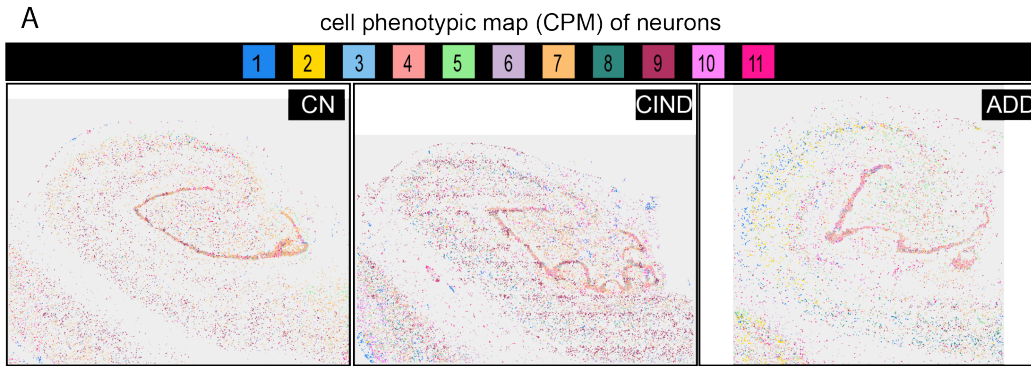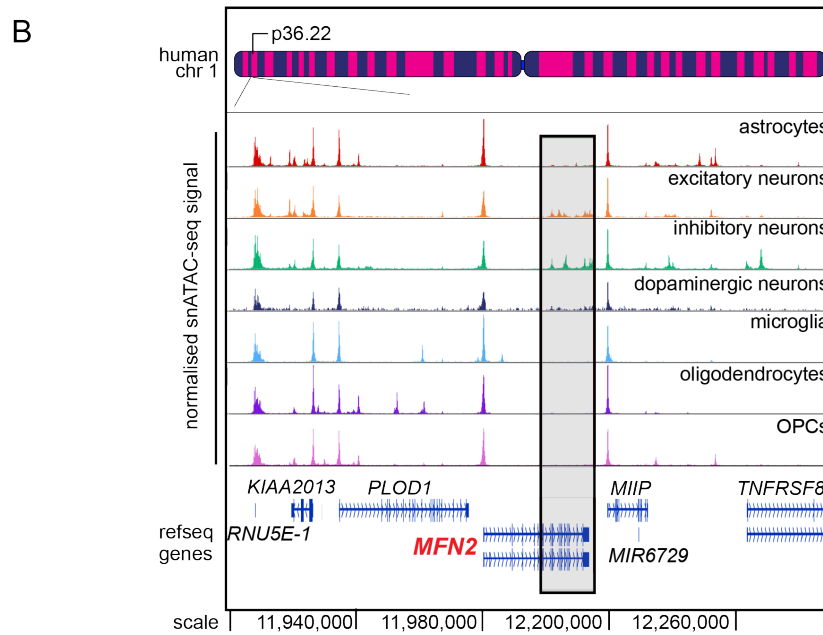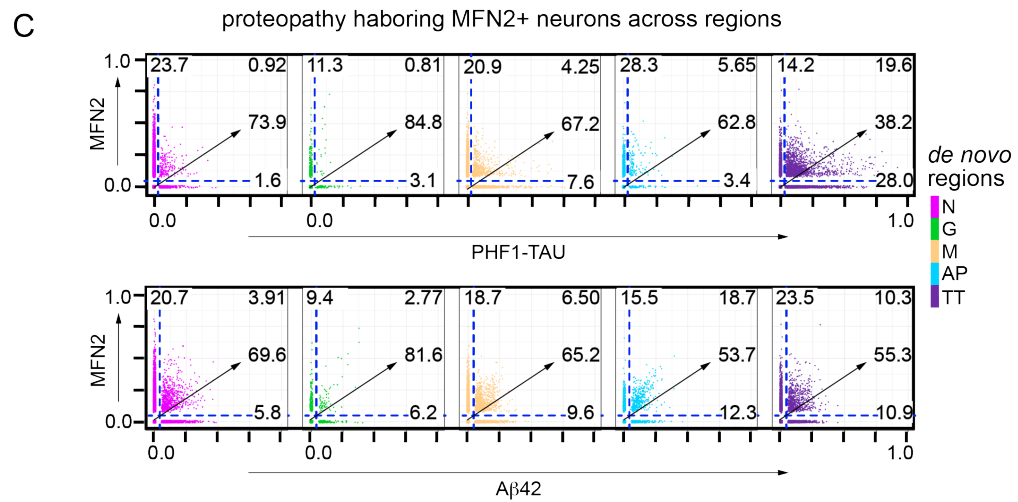

Figure S6D-F ↑

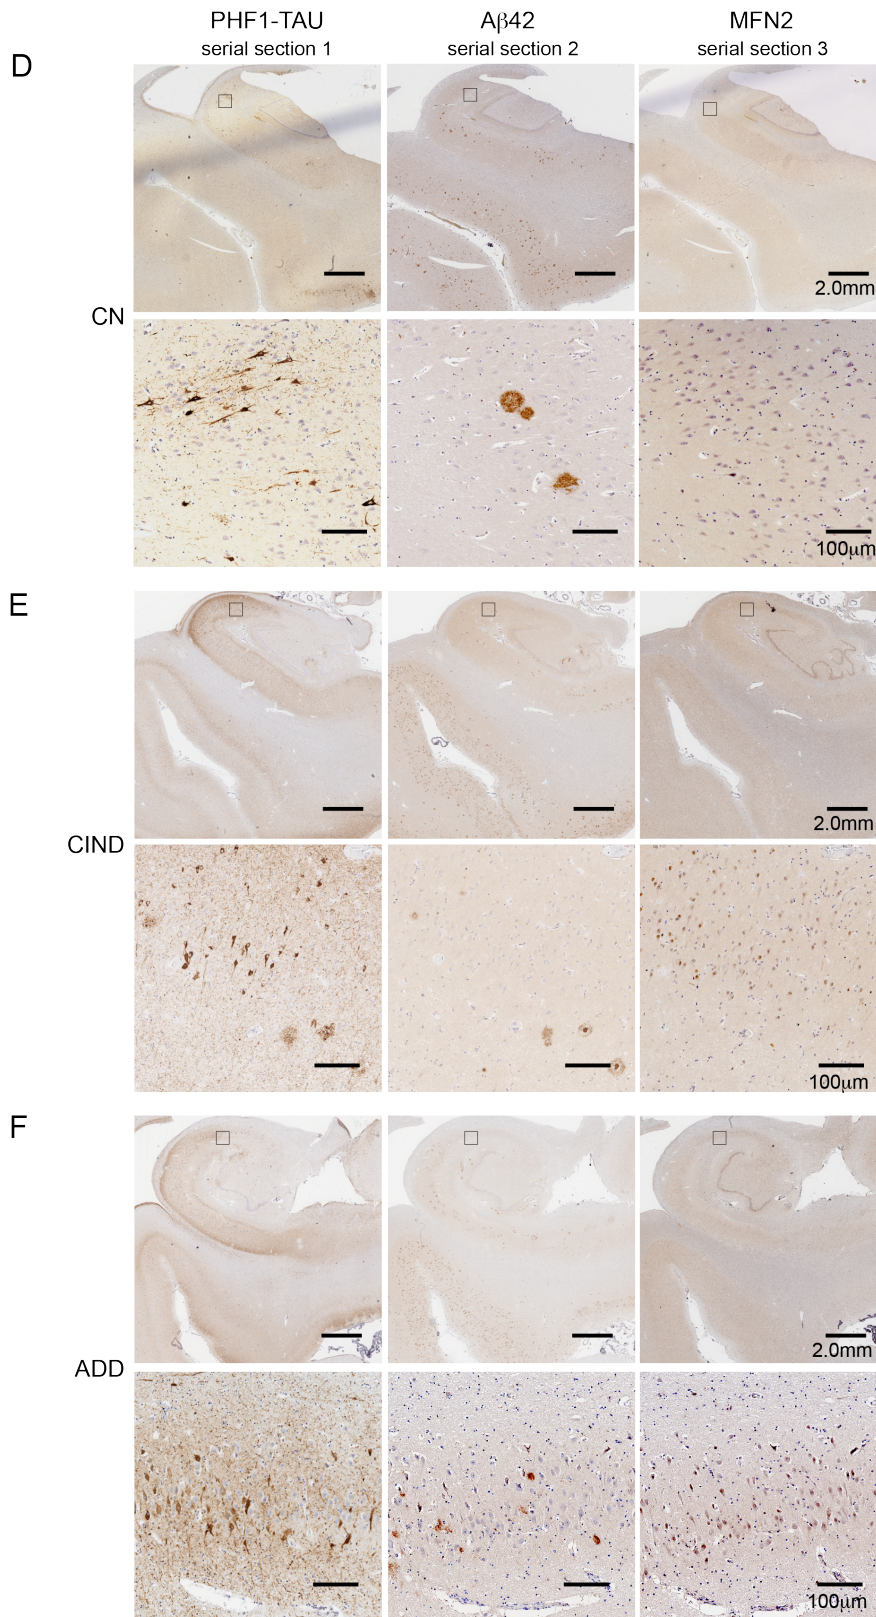



Figure S6. Neuronal sub-clustering and MFN2 specificity to neurons.

**(A)** Overlay of tissue samples with neurons alone, colored by subcluster assignment. **(B)** ATAC-seq data from human brain tissue showing localized MFN2 open peaks in neuron cell types only. Gray box represents open MFN2 peaks in neurons alone. **(C)** MFN2 and proteopathy channel relationships across all de novo regions. **(D,E,F)** Validation of PHF1Tau, A $\beta$ 42, and MFN2 marker distribution by IHC on the **(D)** CN, **(E)** CIND, and **(F)** ADD tissue serial recuts respectively.
